# Supplementary material for: The Light Skin Allele of SLC24A5 in South Asians and Europeans Shares Identity by Descent
Source: PLoS Genet. 2013 Nov 7;9(11):e1003912. doi: 10.1371/journal.pgen.1003912 (PMC3820762; doi:10.1371/journal.pgen.1003912)
Supplement: Table S5 — rs1426654-A allele frequency of populations included in geographic and linguistic analyses. (XLSX) [file pgen.1003912.s010.xlsx]

## Sheet: S5
Table S5. rs1426654-A allele frequency of populations included in geographic and linguistic analyses.
Population	District	State	Linguistic affiliationa	GEOGRAPHY	North (N)	East (E)	N	rs1426654 A allele freq
BRAHMINS A	POOLED	UTTAR PRADESH	Indo-European	North	26.05	82.32	210	0.795238
BRAHMINS B	REWA	MADHYA PRADESH	Indo-European	Central	24.53	81.28	21	0.809524
BRAHMINS C	JAMMU	JAMMU N KASHMIR	Indo-European	North	33.38	74.3	34	0.955882
BRAHMINS E	MADURAI	TAMIL NADU	Dravidian*	South	9.8	78.1	20	0.8
KURUMBA	NILGIRI	TAMIL NADU	Dravidian	South	9.41	77.16	37	0.202703
BADAGA	NILGIRI	TAMIL NADU	Dravidian	South	9.41	77.16	31	0.564516
KOTA	NILGIRI	TAMIL NADU	Dravidian	South	9.41	77.16	27	0.796296
TODA	NILGIRI	TAMIL NADU	Dravidian	South	9.41	77.16	21	0.857143
KORKU	AMRAVATI + BULDANA	MAHARASHTRA	Dravidian	West	20.53	76.18	35	0.271429
NIHALI (B + C)	AMRAVATI + BULDANA	MAHARASHTRA	Language isolate*	West	20.53	76.18	68	0.24
KSHTRIYA	JAUNPUR	UTTAR PRADESH	Indo-European	North	25.75	82.7	38	0.842105
KOL	SIDHI	UTTAR PRADESH	Indo-European	North	21.42	81.88	42	0.654762
THARU	GORAKHPUR	UTTAR PRADESH	Indo-European*	North	26.55	83.15	46	0.293478
ROR	KARNAL	HARYANA	Indo-European	North West	29.69	76.98	44	0.943182
YADAVA	MADURAI	TAMIL NADU	Dravidian	South	9.7	78.05	27	0.314815
SAURASHTRIANS	MADURAI	TAMIL NADU	Dravidian*	South	9.75	78.16	25	0.7
CHAMAR	VARANASI	UTTAR PRADESH	Indo-European	North	24.25	82.85	31	0.677419
DHARKAR	VARANASI	UTTAR PRADESH	Indo-European	North	24.25	82.85	28	0.660714
DUSADH	DEORIA	UTTAR PRADESH	Indo-European	North	26.23	83.42	27	0.518519
KANJAR	KANPUR	UTTAR PRADESH	Indo-European	North	26.28	80.24	25	0.7
LOW CASTE	VARANASI	UTTAR PRADESH	Indo-European	North	24.25	82.85	30	0.783333
ASUR + HO	BEGUSARAI	BIHAR	Austroasiatic	East	24.71	85.06	23	0.282609
JUANG	SAMABALPUR	ORISSA	Austroasiatic	East	21.45	83.97	27	0.0740741
GADABA + SAVARA	KORAPUT	ORISSA	Austroasiatic	East	18.82	82.72	20	0.1
PANIYA + MALAYAN	WAYANAD	KERALA	Dravidian	South	11.24	76.1	34	0.294118
BENGALI	KOLKATA	WEST BENGAL	Indo-European	East	22.57	88.37	21	0.642857
KUNABHI	DHARWAR	KARNATAKA	Dravidian	South	15.27	75	18	0.361111
GOND	VIDISHA	MADHYA PRADESH	Dravidian	Central	15.27	75	20	0.375
KHASI	EAST KHASI HILLS	MEGHALAYA	Austroasiatic	North East	25.5	91.5	20	0.075
NAGA + GARO	KOHIMA	NAGALAND	Tibeto-Burman	North East	25.67	94.12	21	0
BHIL + MEGHAWAL	JODHPUR	RAJASTHAN	Indo-European	North West	26.29	73.03	28	0.714286
GUJARATI	NA	GUJARAT	Indo-European	West	21.1	72.8	33	0.924242
PUNJABI	NA	PUNJAB	Indo-European	North West	31.5	76.25	28	0.946429
ANDAMANESE	NA	ANDAMAN & NICOBAR ISLANDS	Andamanese	South	12.5	92.8	17	0
KANETS	Diff districts	HIMACHAL PRADESH	Indo-European	North	20	77	27	0.777778
KAPU	Diff districts	ANDHRA PRADESH	Dravidian	South	17.9	78.81	46	0.521739
NAIDU	Diff districts	ANDHRA PRADESH	Dravidian	South	16.77	79.8	26	0.634615
REDDY	Diff districts	ANDHRA PRADESH	Dravidian	South	17.4	78.8	170	0.602941
a This is based on present day language spoken
* - Following populations have been characterized according to present day language spoken and hence these were excluded from analyses across language families.
Note : Andamanese have been also excluded from analyses because of their distance from mainland and speaking different langauge.
