# Supplementary material for: The Light Skin Allele of SLC24A5 in South Asians and Europeans Shares Identity by Descent
Source: PLoS Genet. 2013 Nov 7;9(11):e1003912. doi: 10.1371/journal.pgen.1003912 (PMC3820762; doi:10.1371/journal.pgen.1003912)
Supplement: Table S13 — Genome-wide rankings of the SLC24A5 gene in haplotype homozygosity tests across world populations. (XLSX) [file pgen.1003912.s018.xlsx]

## Sheet: S13
Table S13. Genome-wide rankings of the SLC24A5 gene in haplotype homozygosity tests across world populations.
	Sample size	rs1426654-A allele frequency	XP-EHH score	rank	empirical p-value	iHS score	rank	empirical p-value
Bantu	19	0.0263158	-2.10105	13044	0.997	0	9345	0.923237
Middle East	133	0.992424	5.98664	1	7.65e-05	NA	NA	NA
Europe	100	0.995	4.92877	5	0.0003	NA	NA	NA
Central Asia	77	0.714	4.34848	27	0.002	0.583333	16	0.00151904
Iran	20	0.925	4.45397	13	0.00099	0.181818	453	0.0428693
Pakistan	165	0.912121	5.76369	3	0.0002	NA	NA	NA
North India	82	NA	3.56137	135	0.01	0.583333	24	0.00230326
South India	56	0.49	1.68564	3351	0.256	0.115385	1041	0.100173
All India	145	NA	2.83238	487	0.0372666	0.230769	292	0.0279854
East Asia	211	0.0592417	0.991177	6215	0.47672	0	5184	0.529142
Oceania	27	0	1.27914	4380	0.334658	0	6534	0.750776
Note : Values in bold comply to significance level at 0.05
